# Supplementary material for: Chitosan Nanoparticles Rescue Rotenone-Mediated Cell Death
Source: MDPI journal article supplement (doi:10.3390/ma12071176), 2019-04-11
Supplement: s1 [file s1]

Supplementary Information

# Chitosan Nanoparticles Rescue Rotenone-Mediated Cell Death

Jyoti Ahlawat <sup>1</sup>, Eva M Deemer <sup>2</sup> and Mahesh Narayan <sup>1,\*</sup>

<sup>1</sup> Department of Chemistry & Biochemistry; The University of Texas at El Paso; Texas 79968; USA; jahlawat@miners.utep.edu

<sup>2</sup> Material Science & Engineering department; The University of Texas at El Paso; Texas 79968; USA; emdeemer@utep.edu

\* Correspondence: mnarayan@utep.edu; Tel.: +1 (915)-747-6614; Fax: +1 (915)-7478383

Received: 13 March 2019; Accepted: 4 April 2019; Published: 11 April 2019

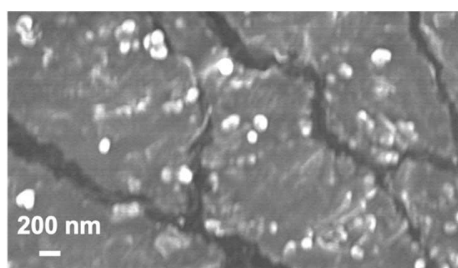

**Supplementary Figure 1.** SEM image of Chitosan nanoparticles in buffer solution.

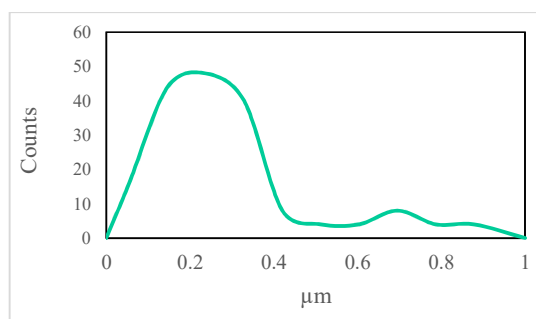

**Supplementary Figure 2.** Size distribution analysis from AFM measurement.
